# Supplementary material for: Interleukin-1β Mediates Arterial Thrombus Formation via NET-Associated Tissue Factor
Source: MDPI journal article supplement (doi:10.3390/jcm8122072), 2019-11-26
Supplement: s1 [file s1]

**A**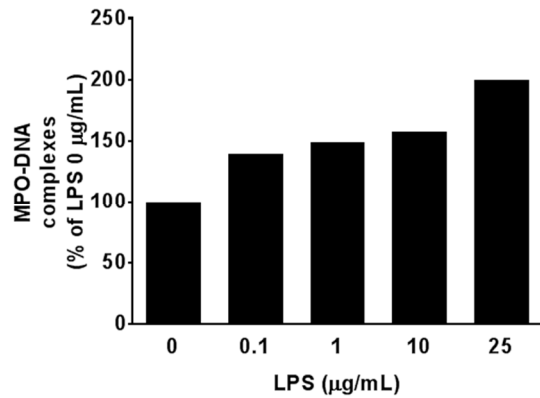**B**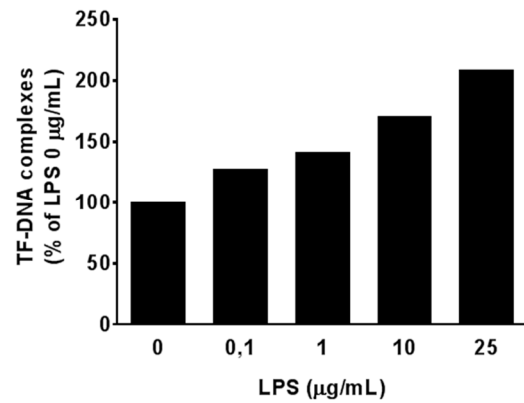**C**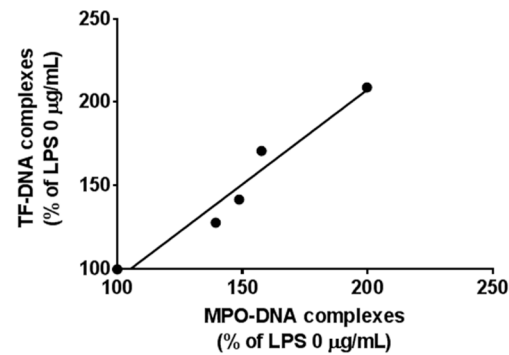

**Supplemental** Figure 1. TF-DNA complex assay validation. **(A)** As previously reported in the literature, MPO-DNA complexes in plasma dose-dependently increased after stimulation of the whole blood with increasing LPS dosages (0–25 µg/mL) ( $n = 1$ ). **(B)** Levels of plasma TF-DNA complexes follow a similar dose-dependent trend being induced by higher LPS concentrations ( $n = 1$ ). **(C)** Direct relationship between MPO-DNA and TF-DNA ( $n = 1$ ). LPS = lipopolysaccharide, MPO = myeloperoxidase, TF = tissue factor.
